# Supplementary material for: Endophilin, Lamellipodin, and Mena cooperate to regulate F-actin-dependent EGF-receptor endocytosis
Source: PubMed Central journal article supplement (PMC3801443; doi:10.1038/emboj.2013.212), 2013-09-27
Supplement: emboj2013212s1.pdf [file emboj2013212s1.pdf]

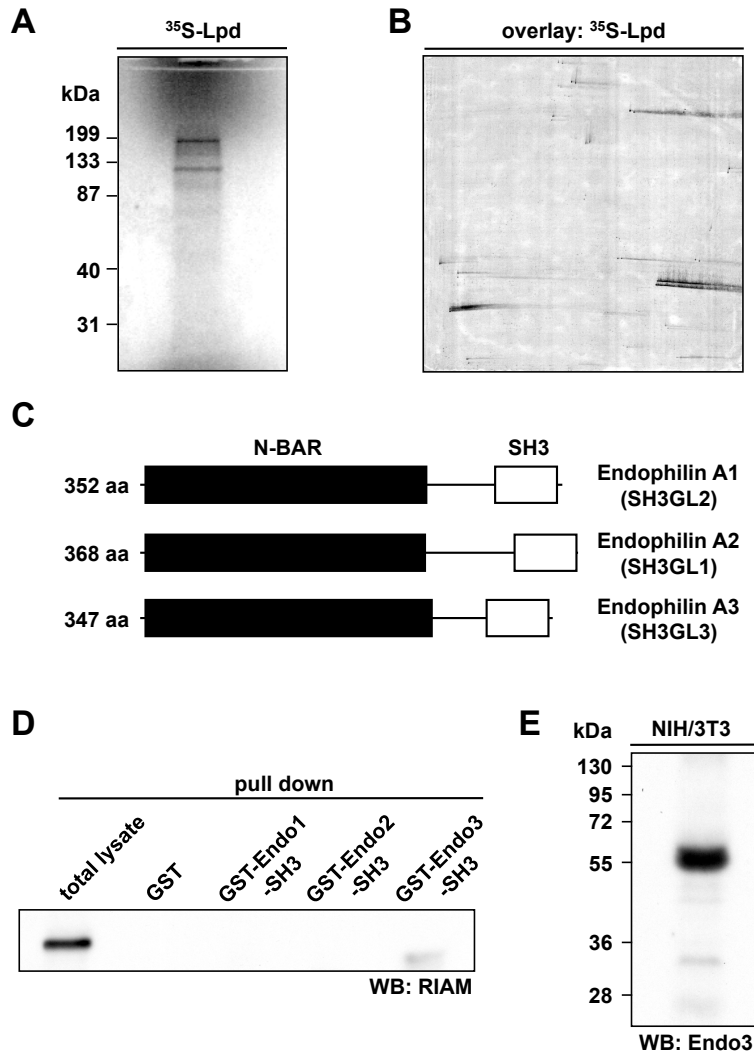

Supplemental Figure 1, Vehlow et al.

**Figure S1: Identification of endophilin as a new Lamellipodin-interacting protein**

**(A)** Autoradiography of  $^{35}\text{S}$ -labelled Lpd. **(B)** Proteomic screen of a human fetal brain protein array with *in vitro* translated,  $^{35}\text{S}$ -labeled full length Lpd as the bait. Dark double spots show positive hits. **(C)** Domain structure of proteins of the endophilin A family. **(D)** Pulldown of RIAM from NIH/3T3 cell lysate using GST-tagged SH3 domains of endophilin A1, endophilin A2 and endophilin A3 or GST as control. A representative blot from 3 independent experiments is shown. **(E)** Detection of endogenous endophilin A3 using specific antibodies in NIH/3T3 cell lysate.

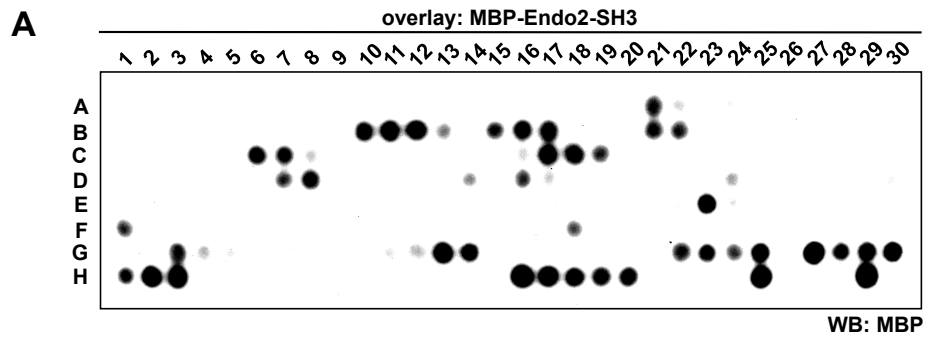

**B**

| Lpd fragment            | peptide               | position                                      | SH3 domain-binding motif                         |
|-------------------------|-----------------------|-----------------------------------------------|--------------------------------------------------|
| <b>GST-Lpd-C1</b>       | SLV <b>PPLSPQPKI</b>  | A21                                           | + <b>PPxxPxxPK</b>                               |
|                         | APMFVKYSTITR          | B10                                           | ++ false positive? (highly charged)              |
|                         | FVKYSTITRLQN          | B11                                           | ++                                               |
|                         | YSTITRLQNASQ          | B12                                           | ++                                               |
|                         | ASQHSGALFK <b>PP</b>  | B15                                           | + <b>KPPxPP</b> , KxPxxP                         |
|                         | HSGALFK <b>PPTPP</b>  | B16                                           | ++                                               |
|                         | ALFK <b>PPTPP</b> VMQ | B17                                           | ++                                               |
|                         | SQSVK <b>PQILVPP</b>  | B21                                           | + <b>KPxxxxPP</b>                                |
|                         | V <b>KPQILVPP</b> NGV | B22                                           | +                                                |
|                         | <b>GST-Lpd-C2</b>     | QFS <b>APPPPLKIH</b>                          | C6                                               |
| <b>APPPPLKIH</b> QVQ    |                       | C7                                            | ++                                               |
| <b>PLPPQAPPKPLV</b>     |                       | C17                                           | ++ <b>PxxPPKP</b> , PxxPxK                       |
| <b>PQAPPKPLVTIP</b>     |                       | C18                                           | ++                                               |
| <b>PPKPLVTIP</b> APT    |                       | C19                                           | (+)                                              |
| <b>GST-Lpd-C3</b>       | <b>PVPVPPPTLPKQ</b>   | D7                                            | (+) <b>PPPxxPK</b>                               |
|                         | <b>VPPPTLPKQQSF</b>   | D8                                            | ++                                               |
| <b>GST-Lpd-C4</b>       | PSVVK <b>QIASQFP</b>  | D16                                           | (+)                                              |
|                         | <b>KPPPTPQR</b> NSSI  | E23                                           | ++ <b>KPPPxxPxR</b> , KxPxxP, PxxPxR             |
|                         | RPSVDSL <b>VSKFT</b>  | F1                                            | (+)                                              |
| <b>GST-Lpd-C5</b>       | CVSAK <b>APVLSGR</b>  | F18                                           | (+)                                              |
|                         | PAVFS <b>GNTPKIV</b>  | G3                                            | +                                                |
|                         | <b>PPPTRPKR</b> NDST  | G13                                           | ++ <b>PPPxRPKR</b>                               |
| <b>GST-Lpd-C6</b>       | <b>TRPKR</b> NDSTRLT  | G14                                           | +                                                |
|                         | VVPQ <b>VPTSPKSS</b>  | G22                                           | +                                                |
|                         | Q <b>VPTSPKSS</b> LSV | G23                                           | (+)                                              |
|                         | T <b>SPKSS</b> LSVQPG | G24                                           | (+)                                              |
|                         | K <b>SSLSVQPG</b> FLA | G25                                           | +                                                |
|                         | Q <b>PGFLADLN</b> RTL | G27                                           | ++ false positives?                              |
|                         | FL <b>ADLNRTL</b> QRK | G28                                           | + false positive? (highly charged)               |
|                         | DL <b>NRTLQRK</b> SIT | G29                                           | ++ false positive? (G27)                         |
|                         | RTL <b>QRKSITR</b> HG | G30                                           | ++ interaction of MBP with GST-Lpd-C6 (Fig. S2d) |
|                         | QR <b>KSITRHG</b> SLS | H1                                            | (+)                                              |
|                         | S <b>ITRHGSL</b> SSRM | H2                                            | ++                                               |
|                         | R <b>HGSLSSR</b> MSRA | H3                                            | ++                                               |
|                         | GG <b>SHISGY</b> ATLR | H16                                           | ++                                               |
| H <b>ISGYATL</b> RRGP   | H17                   | ++                                            |                                                  |
| GY <b>ATLRRG</b> PPPA   | H18                   | +                                             |                                                  |
| TL <b>RRGPPP</b> APPK   | H19                   | + <b>RxPPPxPPK</b>                            |                                                  |
| <b>RGPPP</b> APPKRDQ    | H20                   | +                                             |                                                  |
| <b>PPPPRP</b> VAPPTR    | H25                   | ++ Endophilin A1-binding site in Synaptojanin |                                                  |
| <b>PPPPRP</b> VAPPTR    | H29                   | ++                                            |                                                  |
| <b>negative control</b> | PPP <b>ALPSS</b> APSG | H23                                           | -                                                |
|                         | PPP <b>HSSG</b> PPPPP | H24                                           | -                                                |
|                         | PQA <b>AFPPQ</b> SSLP | H26                                           | -                                                |
|                         | PPP <b>ALPSS</b> APSG | H27                                           | -                                                |
|                         | PPP <b>HSSG</b> PPPPP | H28                                           | -                                                |
|                         | PQA <b>AFPPQ</b> SSLP | H30                                           | -                                                |

Supplemental Figure 2, Vehlow et al.

**Figure S2: Identification of endophilin SH3 domain binding sites within Lamellipodin**

**(A)** SPOTS scan peptide array overlaid with MBP-Endo2-SH3. **(B)** Table showing SH3 domain binding motifs in the Lpd sequence identified in the SPOTS scan peptide array in **(A)**.

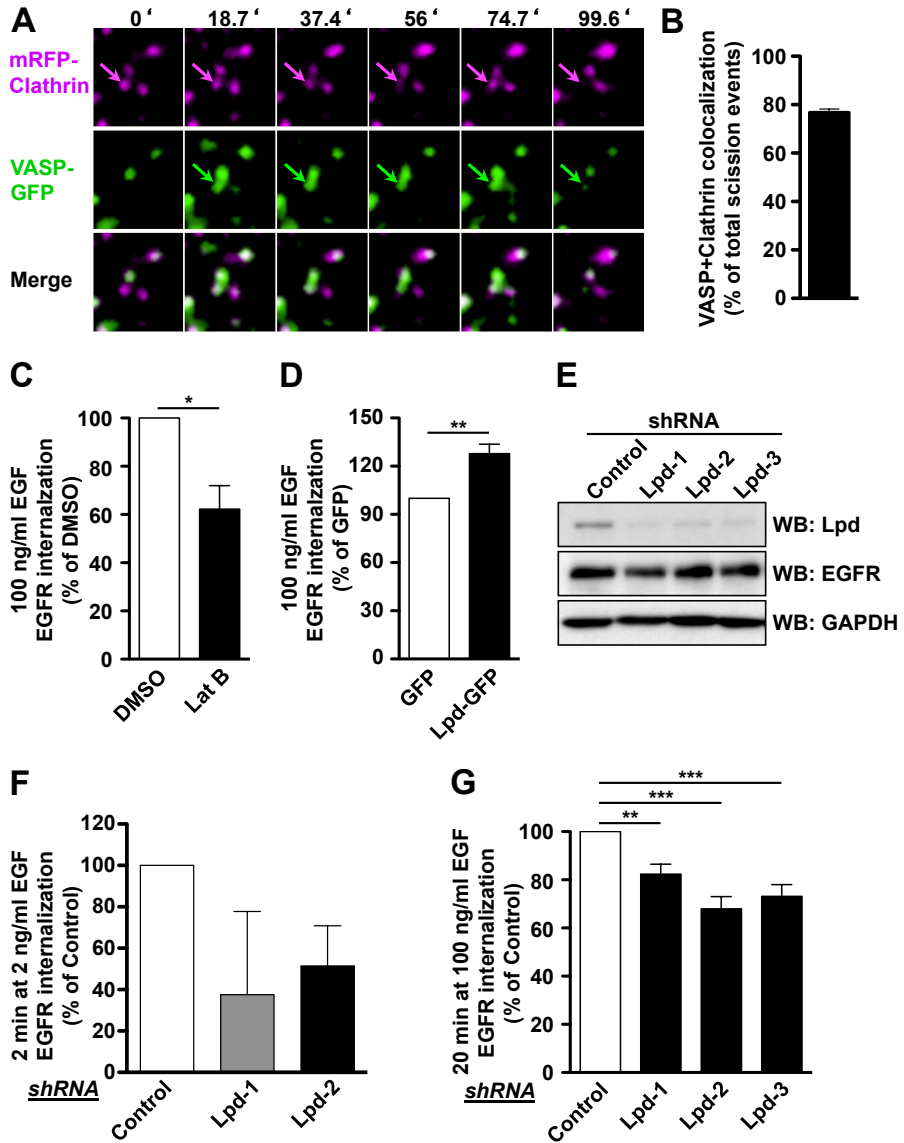

Supplemental Figure 3, Vehlow et al.

### **Figure S3: Lpd localizes to CCPs and regulates endocytosis of the EGFR**

**(A-B)** Dynamics of VASP-GFP and mRFP-Clc in HeLa cells was assessed every 5 sec using TIRFM. Single color and merged images of an area of a representative cell are shown. Arrows show recruitment of VASP-GFP to mRFP-Clc shortly before scission. Scale bar: 1  $\mu$ m. (See also Movie S2.) **(B)** Quantification of the percentage of scission events of CCPs containing mRFP-Clc and VASP-GFP. In total 361 scission events of 3 different cells were analyzed for each experiment. **(C)** EGFR internalization in HeLa cells treated with Latrunculin B (Lat B) or DMSO control and 100 ng/ml EGF. **(D)** EGFR internalization in HeLa overexpressing Lpd-GFP or GFP as control and treated with 100 ng/ml EGF. **(E)** Detection of endogenous Lpd and EGFR using specific antibodies in lysate of HeLa cells expressing three Lpd-specific or control shRNA. GAPDH serves as loading control. **(F-G)** EGFR internalization in HeLa cells expressing Lpd-specific or control shRNA and treated with 2 ng/ml **(F)** or 100 ng/ml **(G)** EGF for indicated times. **(C,D,F,G)** Results are mean  $\pm$  SEM of at least 3 independent experiments. **(C-D)** t-test: \* $p < 0.05$ , \*\* $p < 0.01$ . **(G)** One-way ANOVA, Tukey's: \* $p < 0.05$ , \*\* $p < 0.01$ , \*\*\* $p < 0.001$ .

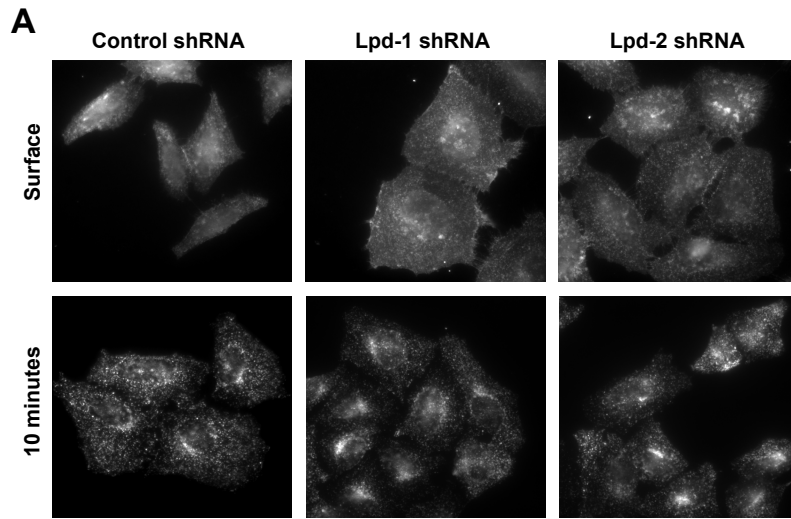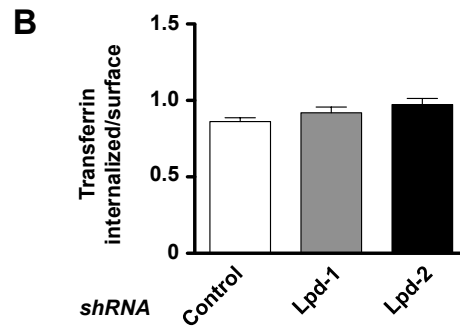

Supplemental Figure 4, Vehlow et al.

**Figure S4: Lpd does not regulate constitutive transferrin receptor endocytosis.**

**(A,B)** Transferrin uptake was quantified with an imaging based uptake assay. **(A)** Alexa-488 transferrin at the surface and internalized after 10 min incubation in control shRNA expressing and Lpd knockdown HeLa cells. **(B)** Transferrin uptake was quantified as intensity per area from 30 cells from 3 independent experiments. The ratio between the internalized and surface bound A488-transferrin is shown.



**A**

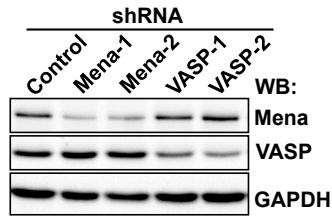

**B**

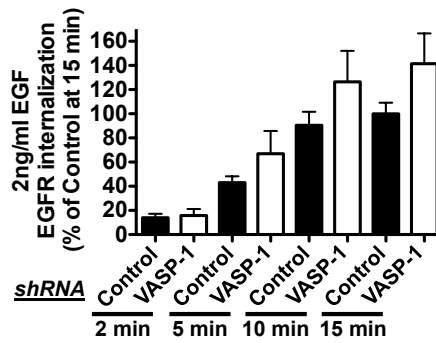

**C**

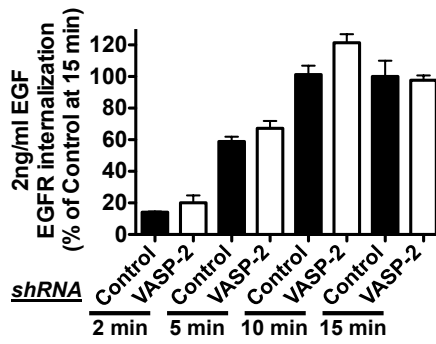

Supplemental Figure 5, Vehlow et al.

### **Figure S5: Mena but not VASP regulates CME of the EGFR**

**(A)** Detection of endogenous Mena and VASP using specific antibodies in lysates of HeLa cells expressing two different Mena- or VASP-specific or control shRNA. GAPDH serves as loading control. **(B-C)** EGFR internalization in HeLa cells expressing two VASP-specific or control shRNA and treated with 2 ng/ml EGF for indicated times. Results are mean  $\pm$  SEM of at least 3 independent experiments.

### **Movie S1: Lpd localizes to spots at the plasma membrane in addition to its known localization at the leading edge of cells.**

Localization of Lpd-GFP was analysed in B16F1 cells by TIRF microscopy.

### **Movie S2: VASP localizes to CCPs.**

Co-localization of GFP-VASP (shown in green) and mRFP-Clc (shown in magenta) at CCPs was analysed in HeLa cells by TIRF microscopy. The arrow highlights a CCP scission event (related to Figure S3A and S3B).

### **Movie S3: Lpd localizes to CCPs before scission.**

Co-localization of Lpd-GFP (shown in green) and mRFP-Clc (shown in magenta) at CCPs was analysed in HeLa cells by TIRF microscopy. The arrow highlights a CCP scission event (related to Figure 4I and 4J).
